# Supplementary material
Source: PubMed Central journal article supplement (PMC4456218)
Supplement: NIHMS651381-supplement-1.pdf [file NIHMS651381-supplement-1.pdf]

## Supplemental Data

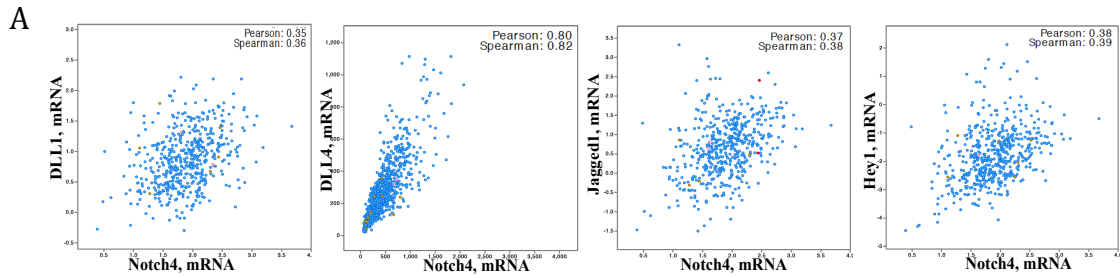

**B**

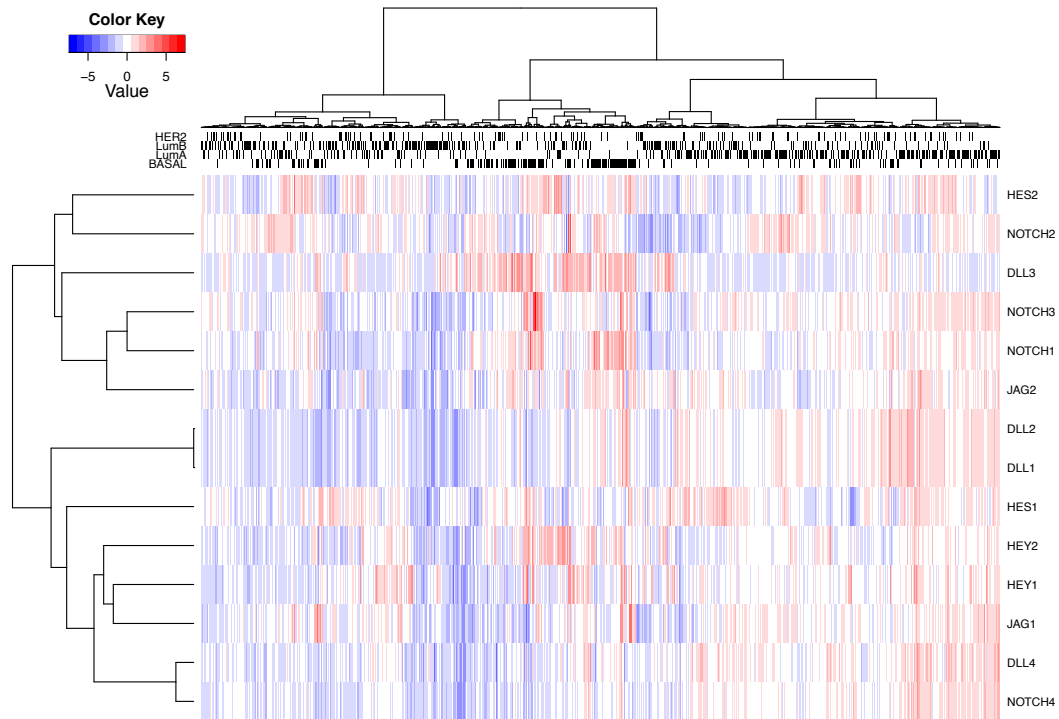

**Supplemental Figure 1. Notch4 mRNA expression correlates with Notch ligands and downstream effectors. A)** TCGA analyses of breast cancer data set utilizing the cBioPortal show a positive correlation between the Notch4 mRNA expression and DLL1, DLL4, Jagged1 and Hey1 mRNA expressions. **B)** Heat map analyses showing that Notch4 with Hey1, Hes1, Hey2, DLL1, DLL2, DLL4, JAG1

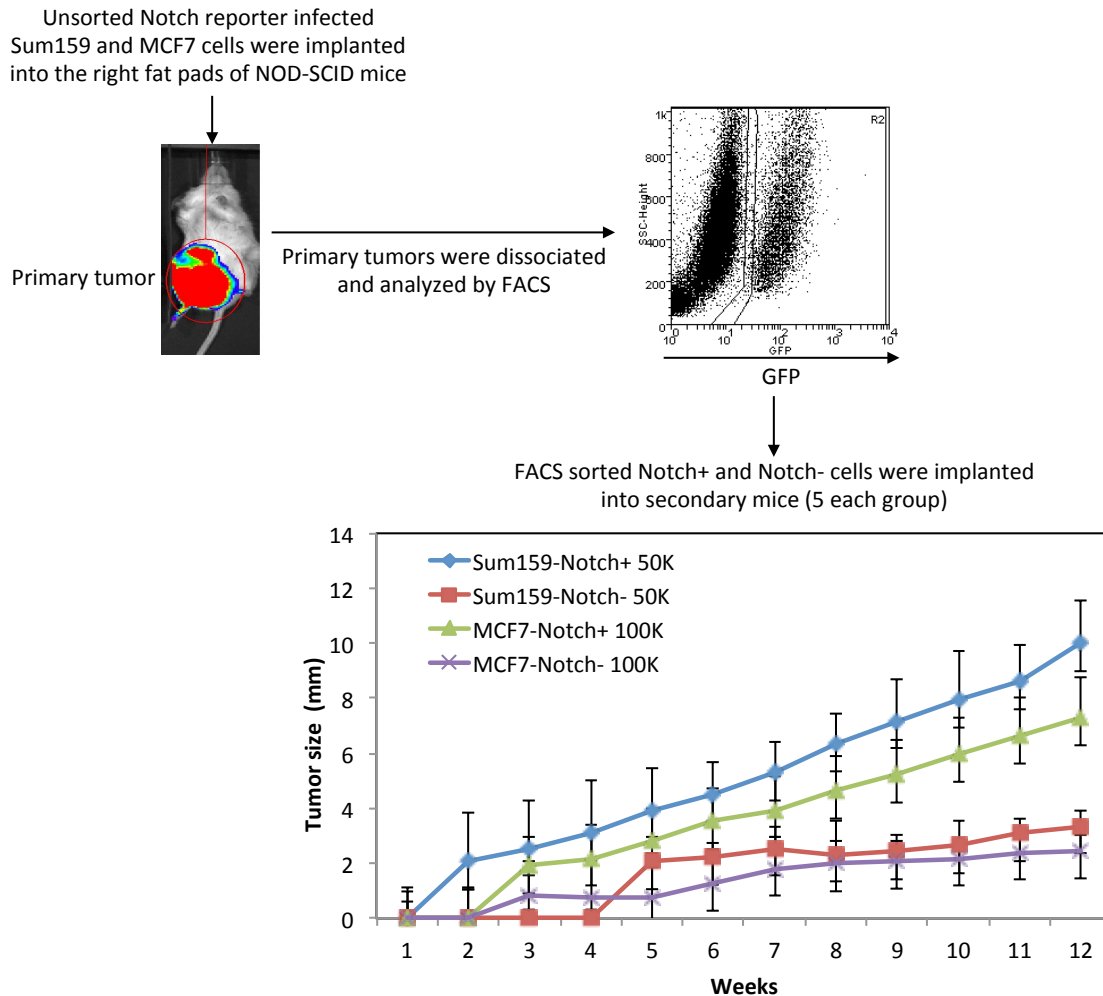

**Supplemental Figure 2. A schematic outline of experimental procedures.** Unsorted Sum159 or MCF7 cells expressing Notch reporter implanted into the fat pads of NOD-SCID mice and the resulting tumors were dissociated and analyzed by flow for GFP expression. GFP+ (Notch active) and GFP- (Notch inactive) cells were Flow sorted and re-implanted into the animals and the tumor growth is monitored.

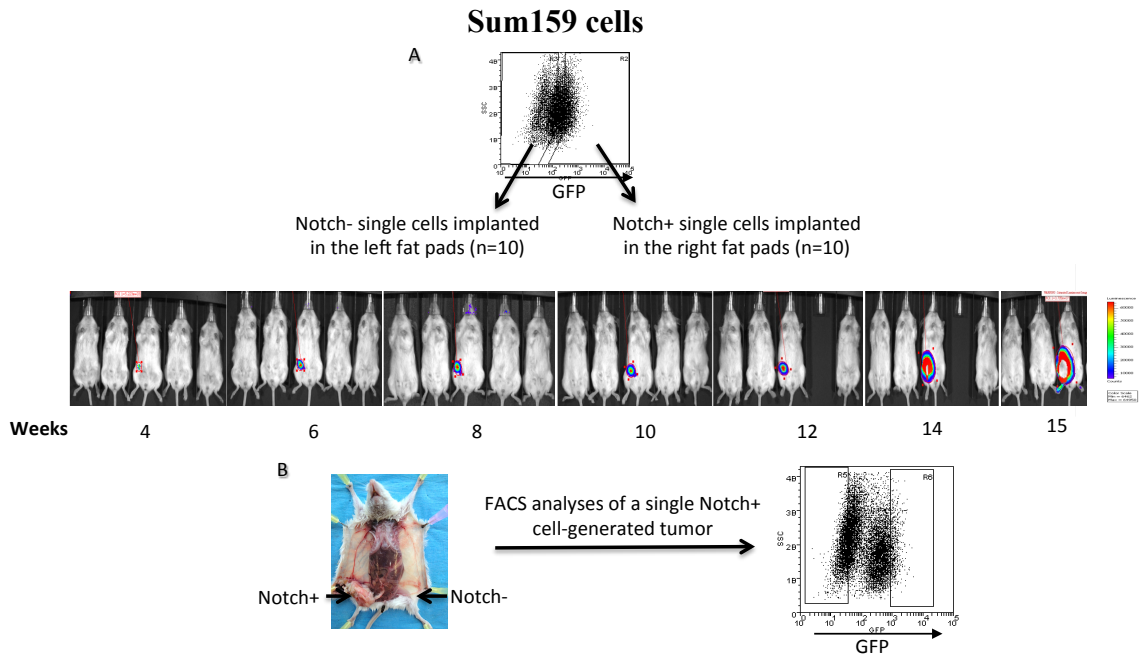

**Supplemental Figure 3. A single Notch+ cell has the capacity to generate tumors that represents the initial heterogeneity. (A)** FACS sorted single Sum159 Notch+ (n=10) or Notch- (n=10) cells were implanted into the fat pads of NOD-SCID mice. Notch activity and tumor growth were monitored by bioluminescent imaging in live animals. One out of ten implantation of Notch+ single cells was able to grow tumor and showed a strong Notch activity *in vivo*. **(B)** When single Notch+ cell generated tumor was FACS analyzed, it showed a similar phenotypic heterogeneity of primary tumors.

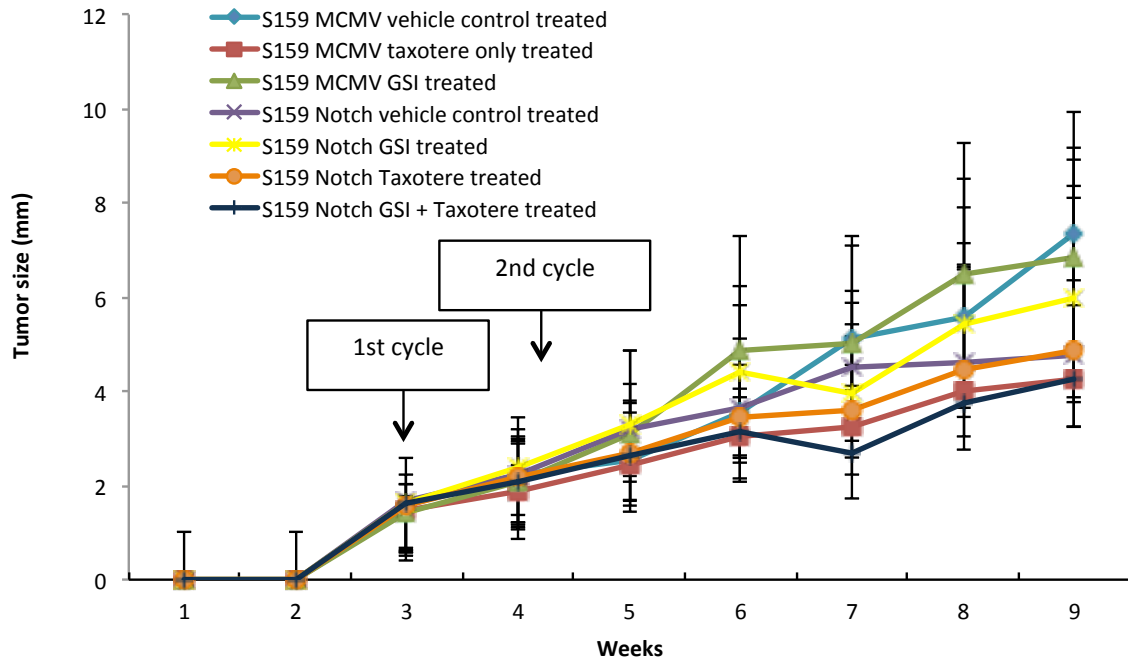

**Supplemental Figure 4. Evaluation of tumor growth following the treatment of animals with GSI, Docetaxel or combination treatments.** Sum159 cells expressing Notch reporter implanted into the fat pads of NOD-SCID animals and the first cycle of treatment was started at 3 weeks post implantation and repeated after one week. Animals were terminated after 9 weeks for analyses.
